# Supplementary material
Source: Research Square preprint supplement (doi:10.21203/rs.3.rs-8942230/v1)
Supplement: Supplementary file 1 [file 1fc6683936bfb6242992278b.docx]

**Ambition Disparity Reveals Unlocked Mitigation Potential for Blue Carbon in the Paris Agreement**

Radhika Bhargava Gajre1, Anabel Kadri2, Maria Fernanda Adame3, Stacy K. Baez4, Natasha Bhatia5, Jacob J. Bukoski6, Miguel Cifuentes-Jara7, Peter I. Macreadie8, Sai Qu1, Michiel van Breugel1, Hao Tang1, Daniel A. Friess2

1. Department of Geography, National University of Singapore, Singapore
2. Department of Earth and Environmental Sciences, Tulane University, New Orleans, Louisiana, USA
3. Australian Rivers Institute, Griffith University, Nathan, Brisbane, Australia
4. The Pew Charitable Trusts, Washington, D.C., USA
5. The Asian School of the Environment, Nanyang Technological University, Singapore
6. Department of Forest Ecosystems & Society, Oregon State University, Corvallis, Oregon, USA
7. Smithsonian Environmental Research Centre, Edgewater, Maryland, USA
8. Royal Melbourne Institute of Technology, Melbourne, Victoria, Australia


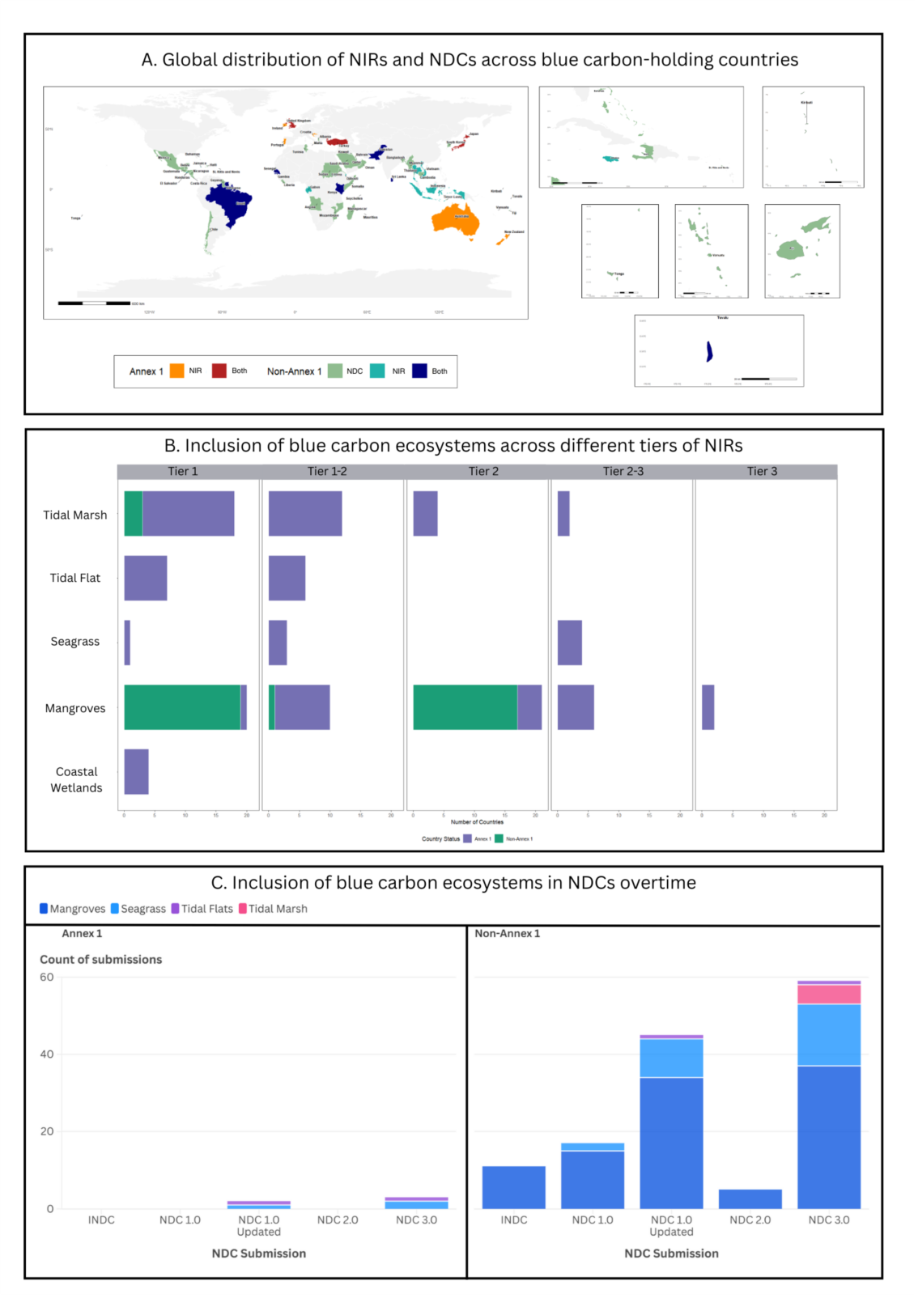


***Supplementary Figure 1| Global distribution of blue carbon inclusion based on NIRs and NDCs between Annex I and Non-Annex I countries since 2015****. A. Spatial distribution of countries where blue carbon ecosystems are accounted as a part of their NIRs, or included as mitigation targets in NDCs, or both. The map shows a total inclusion in either reports between 2015 and 2025 through multiple NIR and NDC submissions. B. Count of blue carbon ecosystems per NIR tier. The tier system progresses from Tier 1 inclusion, which utilises IPCC default values, to Tier 3, employing country-specific data. The Tier 1-2 methodology utilises country-specific and some default values. Tier 2 employs country-specific measurements (but no modelling), and Tier 2-3 incorporates some country-specific values with basic spatial models. C. Frequency distribution of inclusion of blue carbon ecosystems as mitigation targets in NDCs between 2015-2025 through INDC and NDC 1.0 – NDC 3.0 submissions.*


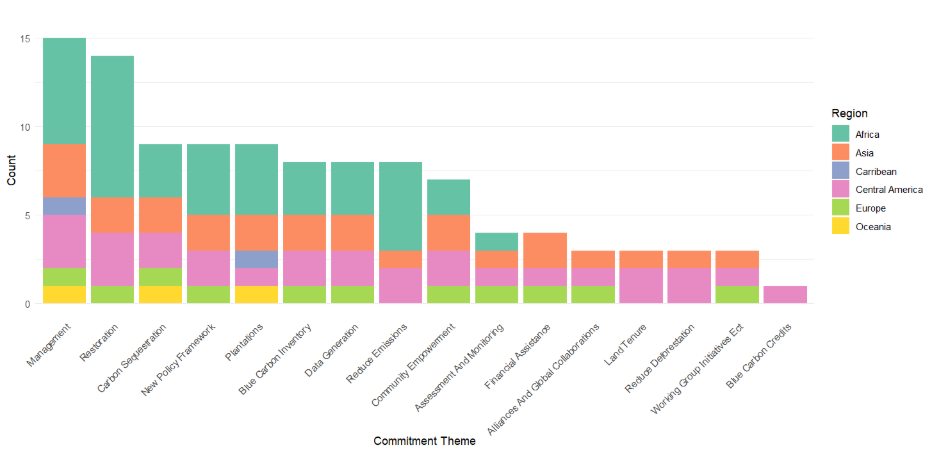


***Supplementary Figure 2 | Regional distribution of Blue Carbon themes in Nationally Determined Contributions (NDCs) by target type between 2015 and 2025. Stacked bars*** *represent the frequency of specific blue carbon themes across geographic regions, categorized by unconditional and quantitative target status.*


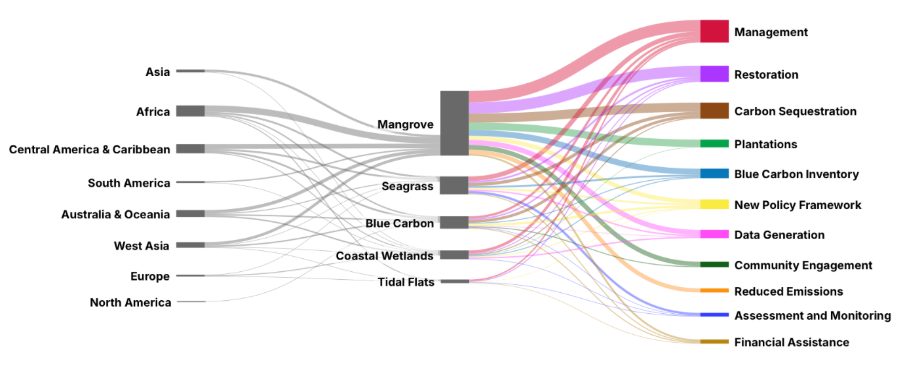


***Supplementary Figure 3 | Integration of coastal blue carbon ecosystems into national climate mitigation targets (2015–2025).*** *Sankey diagram illustrating the thematic flow from geopolitical groupings and geographic regions to all coastal ecosystems and their respective mitigation-oriented policy themes, as extracted from NDC reports submitted between 2015 and 2025. Node widths are proportional to the frequency of countries under those mitigation targets. The visualisation reveals a predominant focus on mangrove ecosystems within Non-Annex I regions, with 'Management' and 'Carbon Sequestration' emerging as the primary thematic drivers for emission reduction commitments. Conversely, seagrass and tidal marsh ecosystems exhibit lower levels of integration into formal mitigation pathways.*


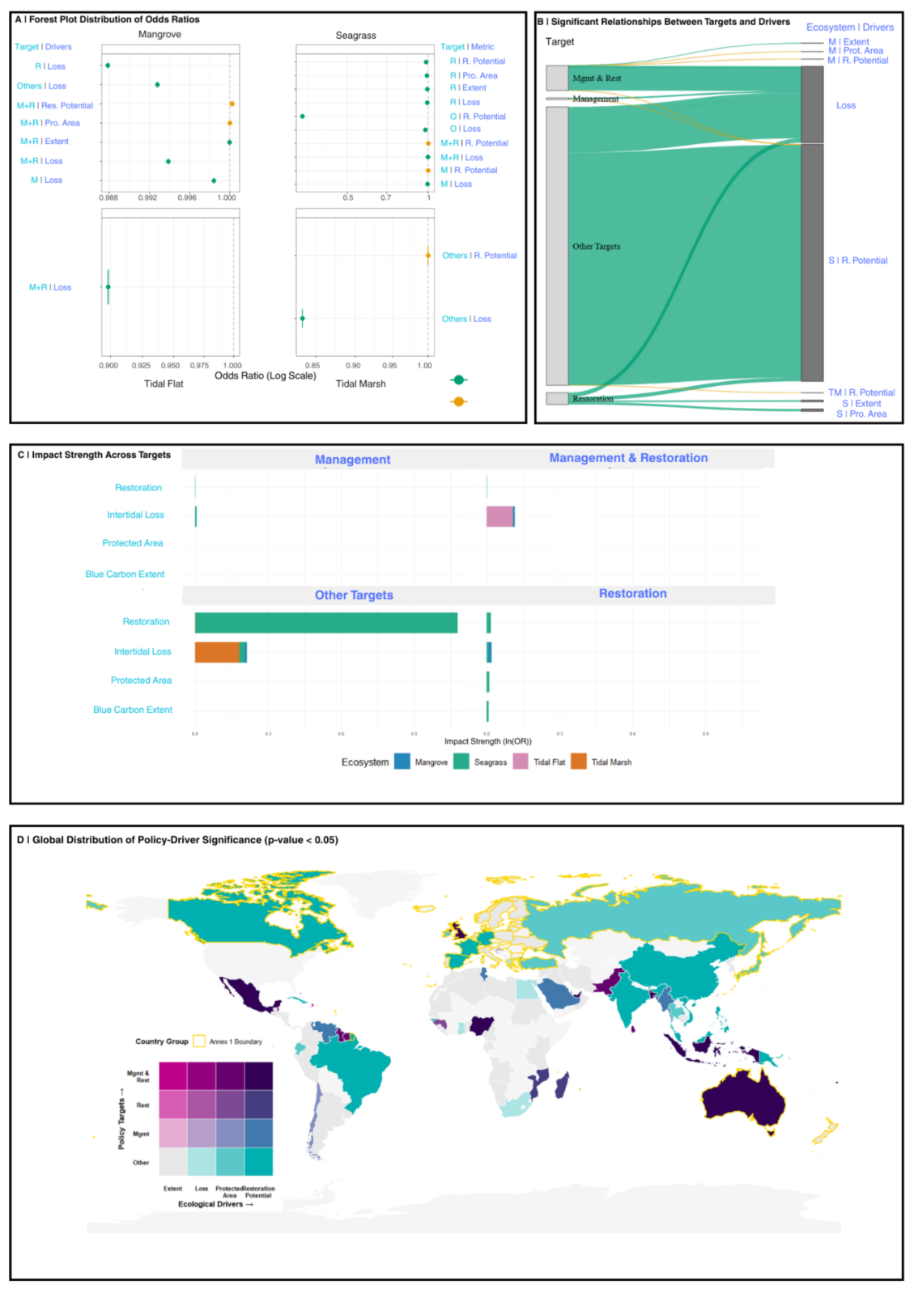


***Supplementary Figure 4 | Drivers of inclusion of blue carbon-based mitigation action in NDCs.*** *Multi-panel display of ecological drivers influencing the inclusion of blue carbon ecosystems in national climate policies.* ***(A)*** *Forest plot showing the odds ratios (OR) for metrics that significantly influence specific policy categories (A: General, AR: Adaptation/Resilience, I: Implementation, R: Restoration). Error bars represent 95% confidence intervals; points to the right of the dashed line (OR > 1) indicate positive associations, while points to the left (OR < 1) indicate negative associations.* ***(B)*** *Sankey diagram visualising the flow of influence from ecological metrics (right) to specific policy outcomes (left). Ribbon thickness represents the magnitude of the effect.* ***(C)*** *Heatmap summarising the influence of all metrics across the four studied ecosystems (M: Mangrove, S: Seagrass, TF: Tidal Flat, TM: Tidal Marsh). Colours represent binned OR values, highlighting consistent global patterns such as the negative impact of intertidal loss*

**Supplementary Table 1: Odds Ratio for Multinomial Logistic Regression (TM = Tidal Marsh, TF = Tidal Flat)**

| Ecosystem | Policy_Target | Variable | Odds_Ratio | P_Value | Lower_CI | Upper_CI | Significant |
| --- | --- | --- | --- | --- | --- | --- | --- |
| Mangrove | M | Intertidal Loss | 0.9984 | 0 | 0.9984 | 0.9984 | TRUE |
| Mangrove | MR | Intertidal Loss | 0.9939 | 0 | 0.9939 | 0.9939 | TRUE |
| Mangrove | O | Intertidal Loss | 0.9928 | 0 | 0.9928 | 0.9928 | TRUE |
| Mangrove | R | Intertidal Loss | 0.9879 | 0 | 0.9879 | 0.9879 | TRUE |
| Mangrove | MR | Restoration | 1.0002 | 6e-04 | 1.0001 | 1.0004 | TRUE |
| Mangrove | MR | Extent | 1 | 0.0064 | 1 | 1 | TRUE |
| Mangrove | MR | Protected Area | 1 | 0.008 | 1 | 1 | TRUE |
| Mangrove | M | Restoration | 1.0002 | 0.0779 | 1 | 1.0003 | FALSE |
| Mangrove | O | Protected Area | 1 | 0.1128 | 1 | 1 | FALSE |
| Mangrove | M | Extent | 1 | 0.1875 | 1 | 1 | FALSE |
| Mangrove | O | Extent | 1 | 0.4104 | 1 | 1 | FALSE |
| Mangrove | R | Protected Area | 1 | 0.4226 | 1 | 1 | FALSE |
| Mangrove | R | Area | 1 | 0.5527 | 1 | 1 | FALSE |
| Mangrove | R | Restoration | 1 | 0.6045 | 0.9999 | 1.0002 | FALSE |
| Mangrove | M | Protected Area | 1 | 0.6317 | 1 | 1 | FALSE |
| Mangrove | O | Restoration | 1 | 0.7285 | 0.9998 | 1.0001 | FALSE |
| Seagrass | M | Intertidal Loss | 0.9951 | 0 | 0.9951 | 0.9951 | TRUE |
| Seagrass | MR | Intertidal Loss | 0.9985 | 0 | 0.9985 | 0.9985 | TRUE |
| Seagrass | O | Restoration | 0.34 | 0 | 0.34 | 0.34 | TRUE |
| Seagrass | O | Intertidal Loss | 0.977 | 0 | 0.977 | 0.977 | TRUE |
| Seagrass | R | Extent | 0.9929 | 0 | 0.9929 | 0.9929 | TRUE |
| Seagrass | R | Protected Area | 0.9898 | 0 | 0.9898 | 0.9898 | TRUE |
| Seagrass | R | Restoration | 0.9831 | 0 | 0.9831 | 0.9831 | TRUE |
| Seagrass | R | Intertidal Loss | 0.9924 | 0 | 0.9924 | 0.9924 | TRUE |
| Seagrass | M | Restoration | 1.0008 | 0 | 1.0006 | 1.0009 | TRUE |
| Seagrass | MR | Restoration | 1.0009 | 0 | 1.0007 | 1.0012 | TRUE |
| Seagrass | M | Extent | 1 | 0.137 | 1 | 1 | FALSE |
| Seagrass | M | Protected Area | 1 | 0.31 | 1 | 1 | FALSE |
| Seagrass | O | Protected Area | 1 | 0.7037 | 0.9999 | 1.0001 | FALSE |
| Seagrass | MR | Protected Area | 1 | 0.9101 | 1 | 1 | FALSE |
| Seagrass | MR | Extent | 1 | 0.918 | 1 | 1 | FALSE |
| Seagrass | O | Extent | 1 | 0.9212 | 1 | 1 | FALSE |
| TF | MR | Intertidal Loss | 0.8982 | 0 | 0.8979 | 0.8986 | TRUE |
| TF | MR | Extent | 1 | 0.1178 | 1 | 1.0001 | FALSE |
| TF | MR | Protected Area | 0.9999 | 0.3562 | 0.9998 | 1.0001 | FALSE |
| TF | I | Extent | 1 | 0.7296 | 0.9999 | 1.0001 | FALSE |
| TF | M | Protected Area | 1 | 0.8048 | 0.9999 | 1.0001 | FALSE |
| TF | M | Intertidal Loss | 0.9915 | 0.8472 | 0.9095 | 1.081 | FALSE |
| TF | O | Intertidal Loss | 0.9939 | 0.8886 | 0.9123 | 1.0828 | FALSE |
| TF | O | Protected Area | 1 | 0.8966 | 0.9998 | 1.0002 | FALSE |
| TF | M | Extent | 1 | 0.9355 | 0.9999 | 1.0001 | FALSE |
| TM | O | Intertidal Loss | 0.8338 | 0 | 0.8337 | 0.8339 | TRUE |
| TM | O | Restoration | 1.0002 | 0 | 1.0001 | 1.0003 | TRUE |
| TM | MR | Protected Area | 1.0001 | 0.0546 | 1 | 1.0002 | FALSE |
| TM | O | Protected Area | 0.9998 | 0.1157 | 0.9996 | 1 | FALSE |
| TM | O | Extent | 1.0001 | 0.1797 | 1 | 1.0001 | FALSE |
| TM | MR | Extent | 1 | 0.2398 | 0.9999 | 1 | FALSE |
| TM | MR | Restoration | 0.9997 | 0.3787 | 0.9991 | 1.0003 | FALSE |
| TM | M | Restoration | 0.9998 | 0.6543 | 0.9987 | 1.0008 | FALSE |
| TM | M | Protected Area | 0.9978 | 0.6817 | 0.9874 | 1.0083 | FALSE |
| TM | MR | Intertidal Loss | 1.0011 | 0.7511 | 0.9943 | 1.0079 | FALSE |
| TM | M | Intertidal Loss | 0.9896 | 0.8038 | 0.9112 | 1.0747 | FALSE |
| TM | R | Intertidal Loss | 0.9925 | 0.8065 | 0.9348 | 1.0538 | FALSE |
| TM | R | Extent | 0.9999 | 0.8523 | 0.9992 | 1.0007 | FALSE |
| TM | M | Extent | 0.9999 | 0.9149 | 0.9982 | 1.0016 | FALSE |
| TM | R | Restoration | 1 | 0.9233 | 0.9998 | 1.0002 | FALSE |
| TM | R | Protected Area | 1 | 0.9347 | 0.9988 | 1.0011 | FALSE |

**Supplementary Table 2: Global datasets on blue carbon ecosystem extent, carbon stocks, protection and restoration**

| Ecosystem | Extent | | Carbon stocks | | Carbon Sequestration | Protected Area | Deforestation Rate | Restoration |
| --- | --- | --- | --- | --- | --- | --- | --- | --- |
| Dataset | Accuracy; resolution; year | Dataset | Accuracy; resolution; year |  |
| Mangroves | (Bunting et al., 2018) | 94% ; 25 m ; 2020 | Aboveground Carbon(Simard et al., 2019) | Root mean Square (RMSE) from ground validation was 3.6m; 30m; 2000 | (Howard et al., 2023) | (IUCN & UNEP-WCMC, 2024) | (Leal & Spalding, 2024) | (Worthington et al., 2024) |
| Soil Carbon(Sanderman et al., 2018) | Their model captured 84% of the variation; 30 m ; 2000 |  |
| Seagrasses | (McKenzie et al., 2020) | Not Reported; 30 m ; 2020 | Aboveground and soil carbon(Krause et al., 2025) | Confidence Interval = 12.4 to 44.9 Mg Corg​ ha−1 ; 30 m ; variable | (UN Environmental Programme, 2025) | (Griscom et al., 2020) |
| Tidal Marshes | (Worthington et al., 2024) | 85%; 10 m; 2020 | Total Ecosystem Carbon(Macreadie et al., 2021) | NA; extrapolate to 1m soil depth; variable | (Brook et al., 2025) | (Griscom et al., 2020) |
| Tidal Flats | (Murray et al., 2022) | CI 95%; 30 m; 2020 | Total Ecosystem Carbon(Howard et al., 2023) | NA | (Convention on Wetlands et al., 2025) | No Data |
